# Supplementary material for: Suppression of cell division-associated genes by Helicobacter pylori attenuates proliferation of RAW264.7 monocytic macrophage cells
Source: PubMed Central journal article supplement (PMC4468580; doi:10.1038/srep11046), 2015-06-16
Supplement: srep11046-s1.pdf [file srep11046-s1.pdf]

## Supplementary Figures and Tables

### **Suppression of cell division-associated genes by *Helicobacter pylori* attenuates proliferation of RAW264.7 monocytic macrophage cells**

Grace Min Yi Tan<sup>1</sup>, Chung Yeng Looi<sup>2</sup>, Keith Conrad Fernandez<sup>1</sup>, Jamuna Vadivelu<sup>1</sup>, Mun Fai Loke<sup>1\*</sup> & Won Fen Wong<sup>1,3\*</sup>

<sup>1</sup>Department of Medical Microbiology, and <sup>2</sup>Department of Pharmacology, Faculty of Medicine, University of Malaya, 50603 Kuala Lumpur, Malaysia, <sup>3</sup>Tropical Infectious Disease Research and Education Center, University of Malaya, 50603 Kuala Lumpur, Malaysia.

**Supplementary Figure S1**

**Supplementary Figure S2**

**Supplementary Figure S3**

**Supplementary Figure S4**

**Supplementary Table S1**

**Supplementary Table S2**

**Figure S1. Apoptosis assay.** RAW264.7 cells were infected with the indicated MOIs of *H. pylori* for 24 h. Cells were stained with annexin V and propidium iodide from apoptosis kit (BD Biosciences), and analyzed in a flow cytometer.

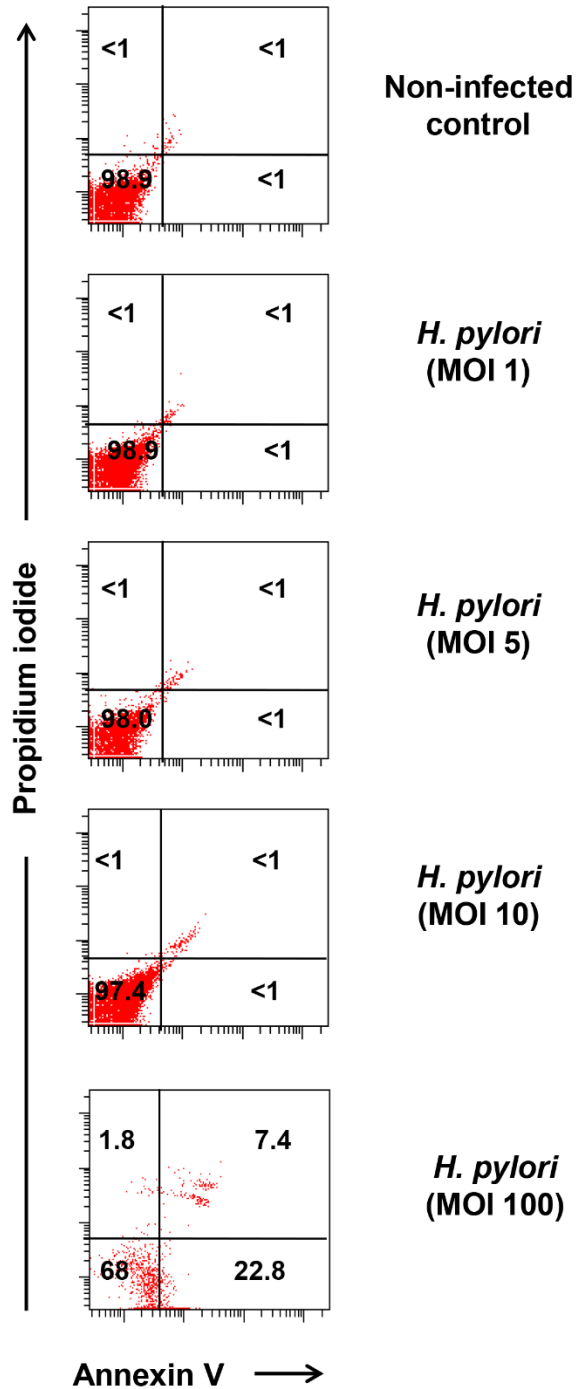

**Figure S2. Q-RT-PCR analysis.** RNA were extracted from non-infected (-) or *H. pylori* (MOI 10, 24 h)-infected RAW264.7 cells. \*P<0.05, \*\*P<0.01, \*\*\*P<0.001.

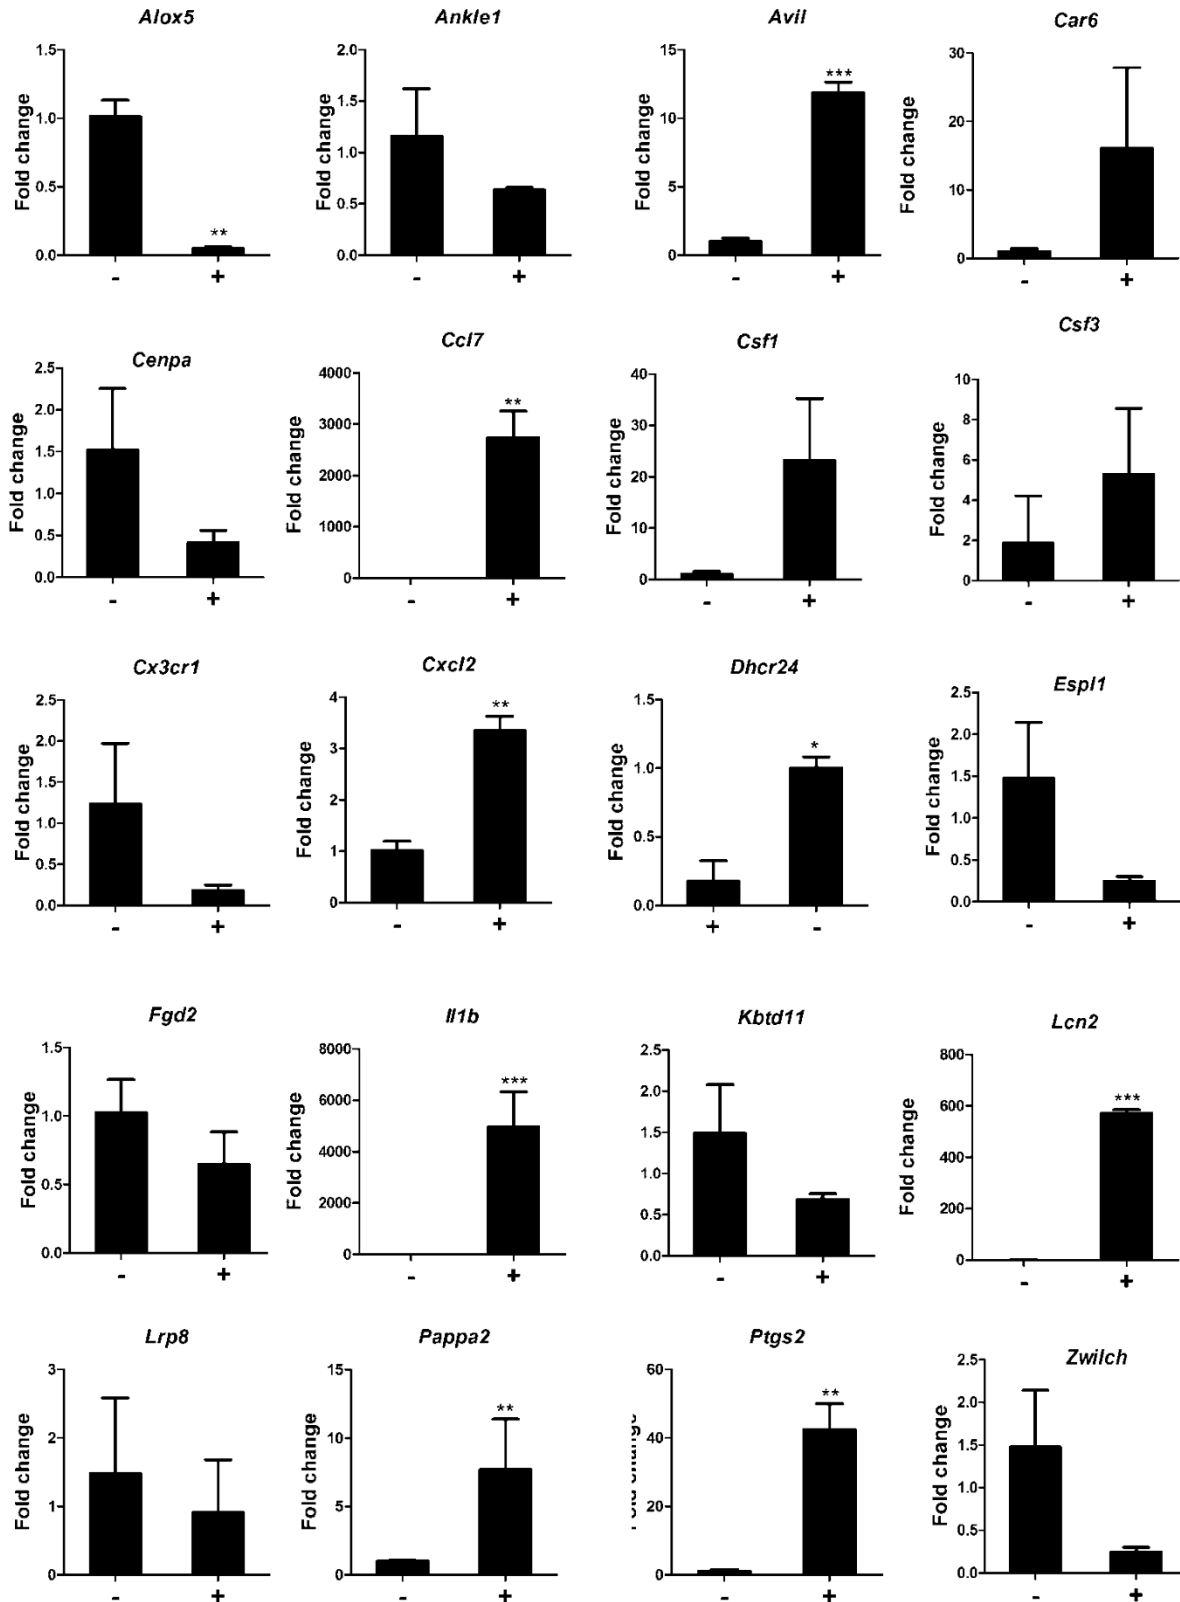

**Figure S3. Effect of different strains of *H. pylori* infection on cell cycle of RAW264.7 cells.**

RAW264.7 cells were uninfected or infected with SS1, J99 or 298 strains at MOI 100 for 24 h.

Cells were harvested at 24 hpi, fixed and stained with propidium iodide (PI) to detect DNA contents.

Numbers represent the percentages of cells at G0/G1, S or G2/M phases.

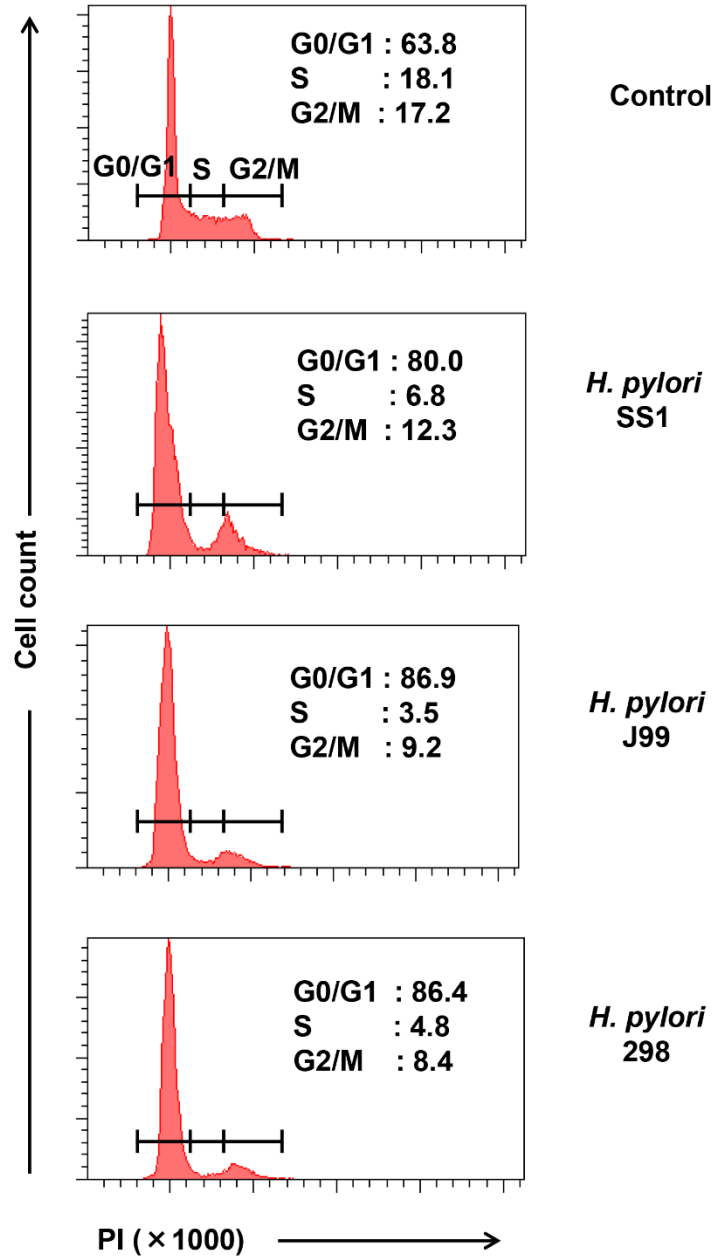

**Figure S4. Full length gel images correspond to cropped images in Figure 6b.** Rectangles (dotted lines) over the gels indicate where the images for the Figure 5b were cropped.

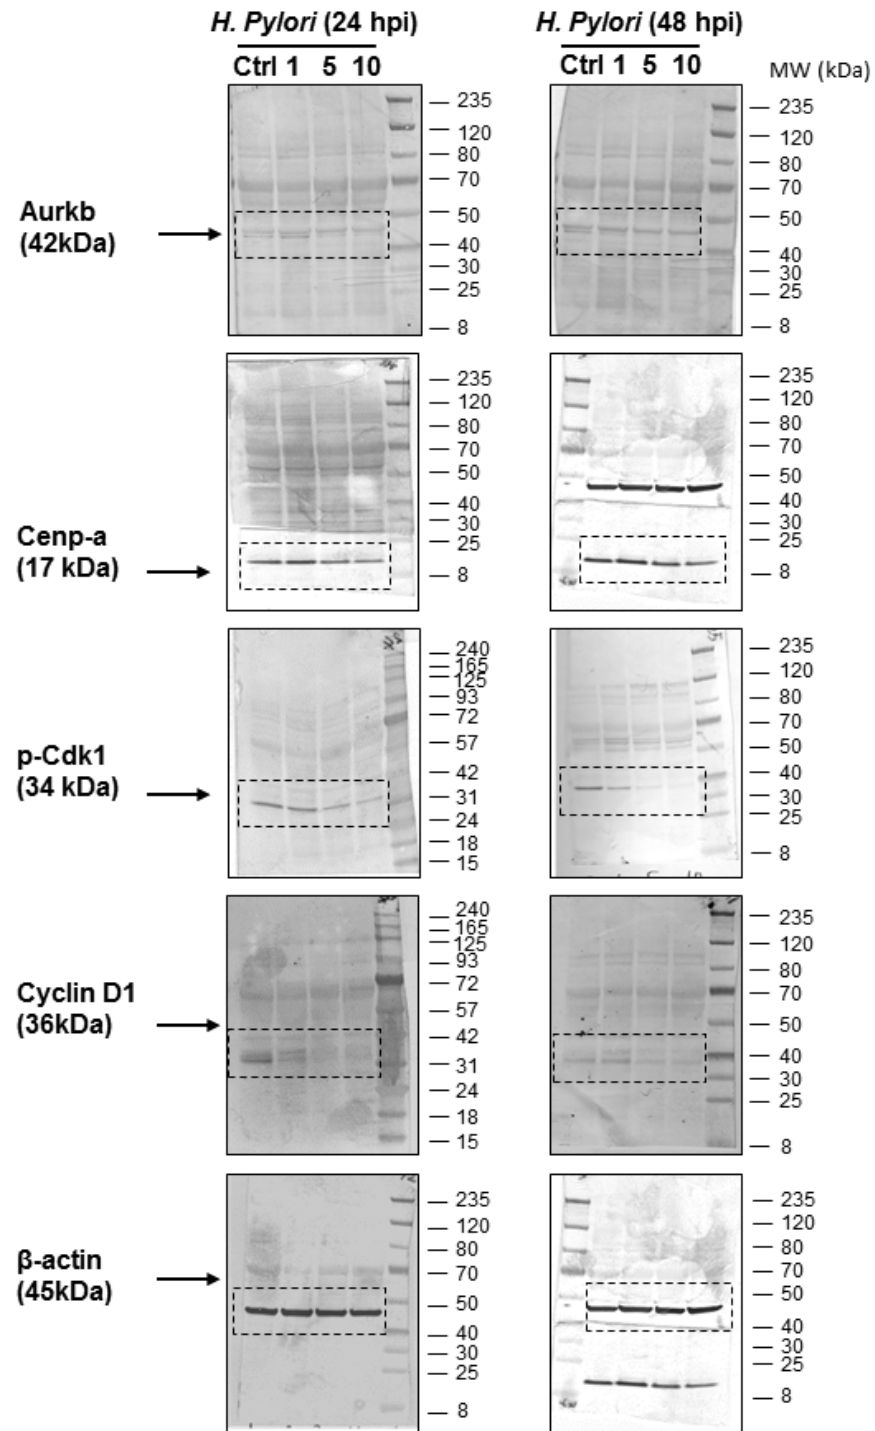

**Table S1.** KEGG pathway analysis. List of top 5 pathways for genes up-regulated by *H. pylori* infection in RAW264.7 cells. Pathways were filtered with  $P < 0.05$  and was presented according to number of genes that were up-regulated or down-regulated in each pathway. The statistical significances were also analyzed with Bonferroni, Benjamini and FDR tests.

| Term                                                          | Count | FE    | Up-regulated Genes                                                                                                                                                                                                                                 | Statistic                                                                                                                           |
|---------------------------------------------------------------|-------|-------|----------------------------------------------------------------------------------------------------------------------------------------------------------------------------------------------------------------------------------------------------|-------------------------------------------------------------------------------------------------------------------------------------|
| mmu04142:<br>Lysosome                                         | 33    | 3.94  | <i>NAGLU, MFSD8, ATP6AP1, AP3S1, CTSA, ACP2, ATP6V0B, ATP6V0C, SLC11A2, AP1S3, SLC11A1, AP3M2, TPP1, NAGA, ATP6V0D1, ATP6V0D2, IDUA, TCIRG1, CLN3, CTSZ, PSAP, ATP6VIH, CD63, GNS, CTSL, NPC1, SLC17A5, LAMP2, GAA, ATP6V0A1, CTSD, GGA1, CLN5</i> | P: $1.20 \times 10^{-11}$<br>Bonferroni: $2.05 \times 10^{-9}$<br>Benjamini: $2.05 \times 10^{-9}$<br>FDR: $1.47 \times 10^{-8}$    |
| mmu04060:<br>Cytokine-<br>cytokine<br>receptor<br>interaction | 31    | 1.80  | <i>CSF3, CSF2, CCL3, CCL2, TNF, CSF2RB2, CCR1, CSF1, CXCL2, CCL9, TNFSF12, IL7R, CCL4, CCL7, IL11, TNFRSF1B, IL23A, IL10RB, CSF2RB, IL1B, IL2RG, FAS, IL1A, LTA, IL11RA1, CD40, OSM, VEGFC, ACVR2A, CCR1L1, ACVR1</i>                              | P: 0.0016<br>Bonferroni: 0.2404<br>Benjamini: 0.0875<br>FDR: 1.94                                                                   |
| mmu00190:<br>Oxidative<br>phosphorylation                     | 16    | 1.75  | <i>TCIRG1, NDUFA3, ATP6AP1, ATP6VIH, ATP6VIG1, ATP6VID, ATP6V0B, ATP6VIF, ATP6V0C, ATP6VIC1, ATP6VIA, ATP6VIE1, COX6A2, ATP6V0A1, ATP6V0D1, ATP6V0D2</i>                                                                                           | P: 0.0373<br>Bonferroni: 0.9985<br>Benjamini: 0.3032<br>FDR: 37.15                                                                  |
| mmu04512:<br>ECM-receptor<br>interaction                      | 13    | 2.23  | <i>ITGB4, ITGB5, ITGB3, COL5A3, VWF, CD47, CD36, CD44, ITGA6, ITGB7, ITGAV, ITGA7, SPP1</i>                                                                                                                                                        | P: 0.0122<br>Bonferroni: 0.8777<br>Benjamini: 0.2310<br>FDR: 13.93                                                                  |
| mmu05414:<br>Dilated<br>cardiomyopathy                        | 13    | 2.01  | <i>TNF, TNNC1, MYBPC3, ITGB4, ITGB5, ITGB3, TPM1, PRKX, ITGA6, ITGB7, ITGAV, ITGA7, SGCB</i>                                                                                                                                                       | P: 0.0259<br>Bonferroni: 0.9889<br>Benjamini: 0.3129<br>FDR: 27.50                                                                  |
| Term                                                          | Count | FE    | Down-regulated Genes                                                                                                                                                                                                                               | Statistic                                                                                                                           |
| mmu03030:<br>DNA<br>replication                               | 27    | -8.27 | <i>POLA1, POLA2, RPA1, PRIM1, RPA2, MCM7, POLE2, PRIM2, FEN1, LIG1, POLE, MCM2, RNASEH2A, MCM3, MCM4, RNASEH2C, MCM5, MCM6, RFC5, DNA2, RFC3, RFC4, RFC1, RFC2, POLD1, POLD2, PCNA</i>                                                             | P: $2.68 \times 10^{-20}$<br>Bonferroni: $4.78 \times 10^{-18}$<br>Benjamini: $2.39 \times 10^{-18}$<br>FDR: $3.30 \times 10^{-17}$ |
| mmu03430:<br>Mismatch<br>repair                               | 15    | -7.31 | <i>EXO1, MSH6, MSH2, LIG1, RFC5, RPA1, RPA2, RFC3, RFC4, RFC1, RFC2, POLD1, POLD2, PCNA, PMS2</i>                                                                                                                                                  | P: $4.93 \times 10^{-10}$<br>Bonferroni: $8.77 \times 10^{-8}$<br>Benjamini: $2.92 \times 10^{-8}$<br>FDR: $6.06 \times 10^{-7}$    |
| mmu03420:<br>Nucleotide                                       | 14    | -3.49 | <i>LIG1, POLE, RFC5, RPA1, RPA2, RFC3, RFC4, POLE2, RFC1, RFC2, POLD1,</i>                                                                                                                                                                         | P: $9.02 \times 10^{-5}$<br>Bonferroni: 0.01594                                                                                     |

|                                                    |    |       |                                                                                            |                                                                                                                                 |
|----------------------------------------------------|----|-------|--------------------------------------------------------------------------------------------|---------------------------------------------------------------------------------------------------------------------------------|
| excision repair                                    |    |       | <i>POLD2, DDB2, PCNA</i>                                                                   | Benjamini: 0.00161<br>FDR: 0.11089                                                                                              |
| mmu00100:<br>Steroid<br>biosynthesis               | 11 | -6.93 | <i>TM7SF2, CYP51, EBP, SQLE, DHCR7, LSS,<br/>HSD17B7, SC4MOL, NSDHL, DHCR24,<br/>FDFT1</i> | P: $4.78 \times 10^{-7}$<br>Bonferroni: $8.52 \times 10^{-5}$<br>Benjamini: $2.13 \times 10^{-5}$<br>FDR: $5.88 \times 10^{-4}$ |
| mmu00900:<br>Terpenoid<br>backbone<br>biosynthesis | 10 | -7.66 | <i>MVD, HMGCR, FDPS, HMGCS1, MVK,<br/>PMVK, ACAT2, IDI1, ACAT1, PDSSI</i>                  | P: $6.41 \times 10^{-7}$<br>Bonferroni: $1.14 \times 10^{-4}$<br>Benjamini: $2.28 \times 10^{-5}$<br>FDR: $7.89 \times 10^{-4}$ |

**Table S2.** Primer sequences for qRT-PCR analysis. List of the forward and reverse primer sequences (5'-3') of the genes selected for qRT-PCR analysis.

| <b>Gene Symbol</b> | <b>Forward primer</b>  | <b>Reverse primer</b>  |
|--------------------|------------------------|------------------------|
| <i>Alox5</i>       | ACAGGAAGTACAGGAAGGGAAC | GGGTTACTCTCTCCAGGGGT   |
| <i>Ankle1</i>      | CTCTTCCCTCACACTGGCTG   | AGACCTGTTTCCTTGGCTGG   |
| <i>Aurkb</i>       | CTGGAGAATGGCTCAGAAGG   | ACAGTGATGGGGGAGAAATG   |
| <i>Avil</i>        | CGCTAATGACAAAAGGCTGC   | CCTCCGCTCCTATCCACAAG   |
| <i>Car6</i>        | CGTGGGAGAAAGTCAGTGGT   | GCCTAGCTGTGTTAGCCGTC   |
| <i>Ccl7</i>        | TCTGTGCCTGCTGCTCATAG   | CATTCCTTAGGCGTGACCAT   |
| <i>Ccnb1</i>       | CTCCCTTTCATCCACAGGAA   | TTGCAGTCTGCCTTCTCTCA   |
| <i>Ccnb2</i>       | CAGTTCCCAAATCCGAGAAA   | GAACAAGTATGCCAGCAGCA   |
| <i>Ccne1</i>       | ACTTTCTGCAGCGTCATCCT   | CTATGTCAACGACACGGGTG   |
| <i>Ccne2</i>       | GACTGGATGGTGCCTTTTGT   | GATGCACAAAATCCTGGGTT   |
| <i>Cdk1</i>        | CCCACCTACGGACAGTGTTT   | CGTATCGCTGTGCTGCTTAG   |
| <i>Cdk2</i>        | TAAGTGCTGTGGGGAACACA   | TCACCCTTCTTCCAGGATG    |
| <i>Cenpa</i>       | CCAGCCACTGAGAGTCACAA   | TTGGGAACTGTAGGTGAGGGC  |
| <i>Csf1</i>        | CCCTGGCTACTGGGTCAATA   | AAAGCTCAGAGGGAGCACTG   |
| <i>Csf3</i>        | CTCAACTTTCTGCCAGAGG    | GCTCTATCGGGTATTTCCCC   |
| <i>Cx3cr1</i>      | GGAGACTGGAGCCAACAGAG   | CAGGACACAGCCAGACAAGA   |
| <i>Cxcl2</i>       | GCCTGGATCGTACCTGATGT   | GGAAGGAGTGTGCATGTTCA   |
| <i>Dhcr24</i>      | GACATCCAGAAACAGGTCCG   | ATAGACACCAAGGGCTCCAC   |
| <i>Espl1</i>       | CTCTTGAACCTTGGCTGTCC   | CATCATTCTGCTCATGGGAA   |
| <i>Fgd2</i>        | TCTGCCTGACCTGCTACA     | GTGAGCCTTTGTGTCCTGG    |
| <i>Il1b</i>        | TGCCACCTTTTGACAGTGATG  | ACGGGAAAGACACAGGTAGC   |
| <i>Kbtd11</i>      | ACAGGTGCGTGGAAGGT      | CTATGGGCGAGTGTCTGGAA   |
| <i>Lcn2</i>        | AATGTCACCTCCATCCTGGTC  | GCTCCTTGGTTCTTCCATACAG |
| <i>Lrp8</i>        | CACACGGATTGGTTTCACTG   | CAGAAGGAATTCAGTCCCCA   |
| <i>Mad11l</i>      | TAGACCGGTGCGAGAGAGAT   | AAAACAGCAGAGTCAGGGGA   |



|               |                      |                      |
|---------------|----------------------|----------------------|
| <i>Pappa2</i> | GAAGTGCTGGCTGAGATTCC | GCTCTTTAATCCTGGGAGGG |
| <i>Ptgs2</i>  | GCAGGAAGTCTTTGGTCTGG | TCCTCCTGGAACATGGACTC |
| <i>Zwilch</i> | TTGCCCATCACAACTACA   | TTAATTCCAGCACTTGGGG  |

---
